# Supplementary material
Source: ML conference proceedings conference paper supplement (https://openreview.net/forum?id=O0bsC6FDly)
Supplement: supplementary_material [file READ ME FIRST.pdf › Replication Package/READ ME FIRST.pdf]

This supplementary package is organized into two main directories:

- The **trees** directory contains the sample trees presented in the paper. We understand the trees presented in the supplementary material are quite large and, therefore, difficult to understand. To display the results of our work, the interactive and explorable versions of these trees are available <https://prismbench.github.io/Demo> under the **showcase** tab. These interactive trees contain the entire evaluation process and data that is presented in the paper. We hope that these versions will allow you to engage directly with the data and explore the evaluation process in more depth.
- The **code** directory contains our replication package. The replication package is also available at <https://github.com/PrismBench/PrismBench/tree/replication-package>, which we will not update in order to allow for replication of the results as they are presented in the paper. We recommend viewing it there, as the *README.md*, which contains the full instructions on how to run the framework and benchmarking procedures, includes Mermaid diagrams that illustrate the workflow at each node. These diagrams cannot be rendered properly by standard markdown viewers and can be viewed better on GitHub.
