# Supplementary material
Source: ML conference proceedings conference paper supplement (https://openreview.net/forum?id=O0bsC6FDly)

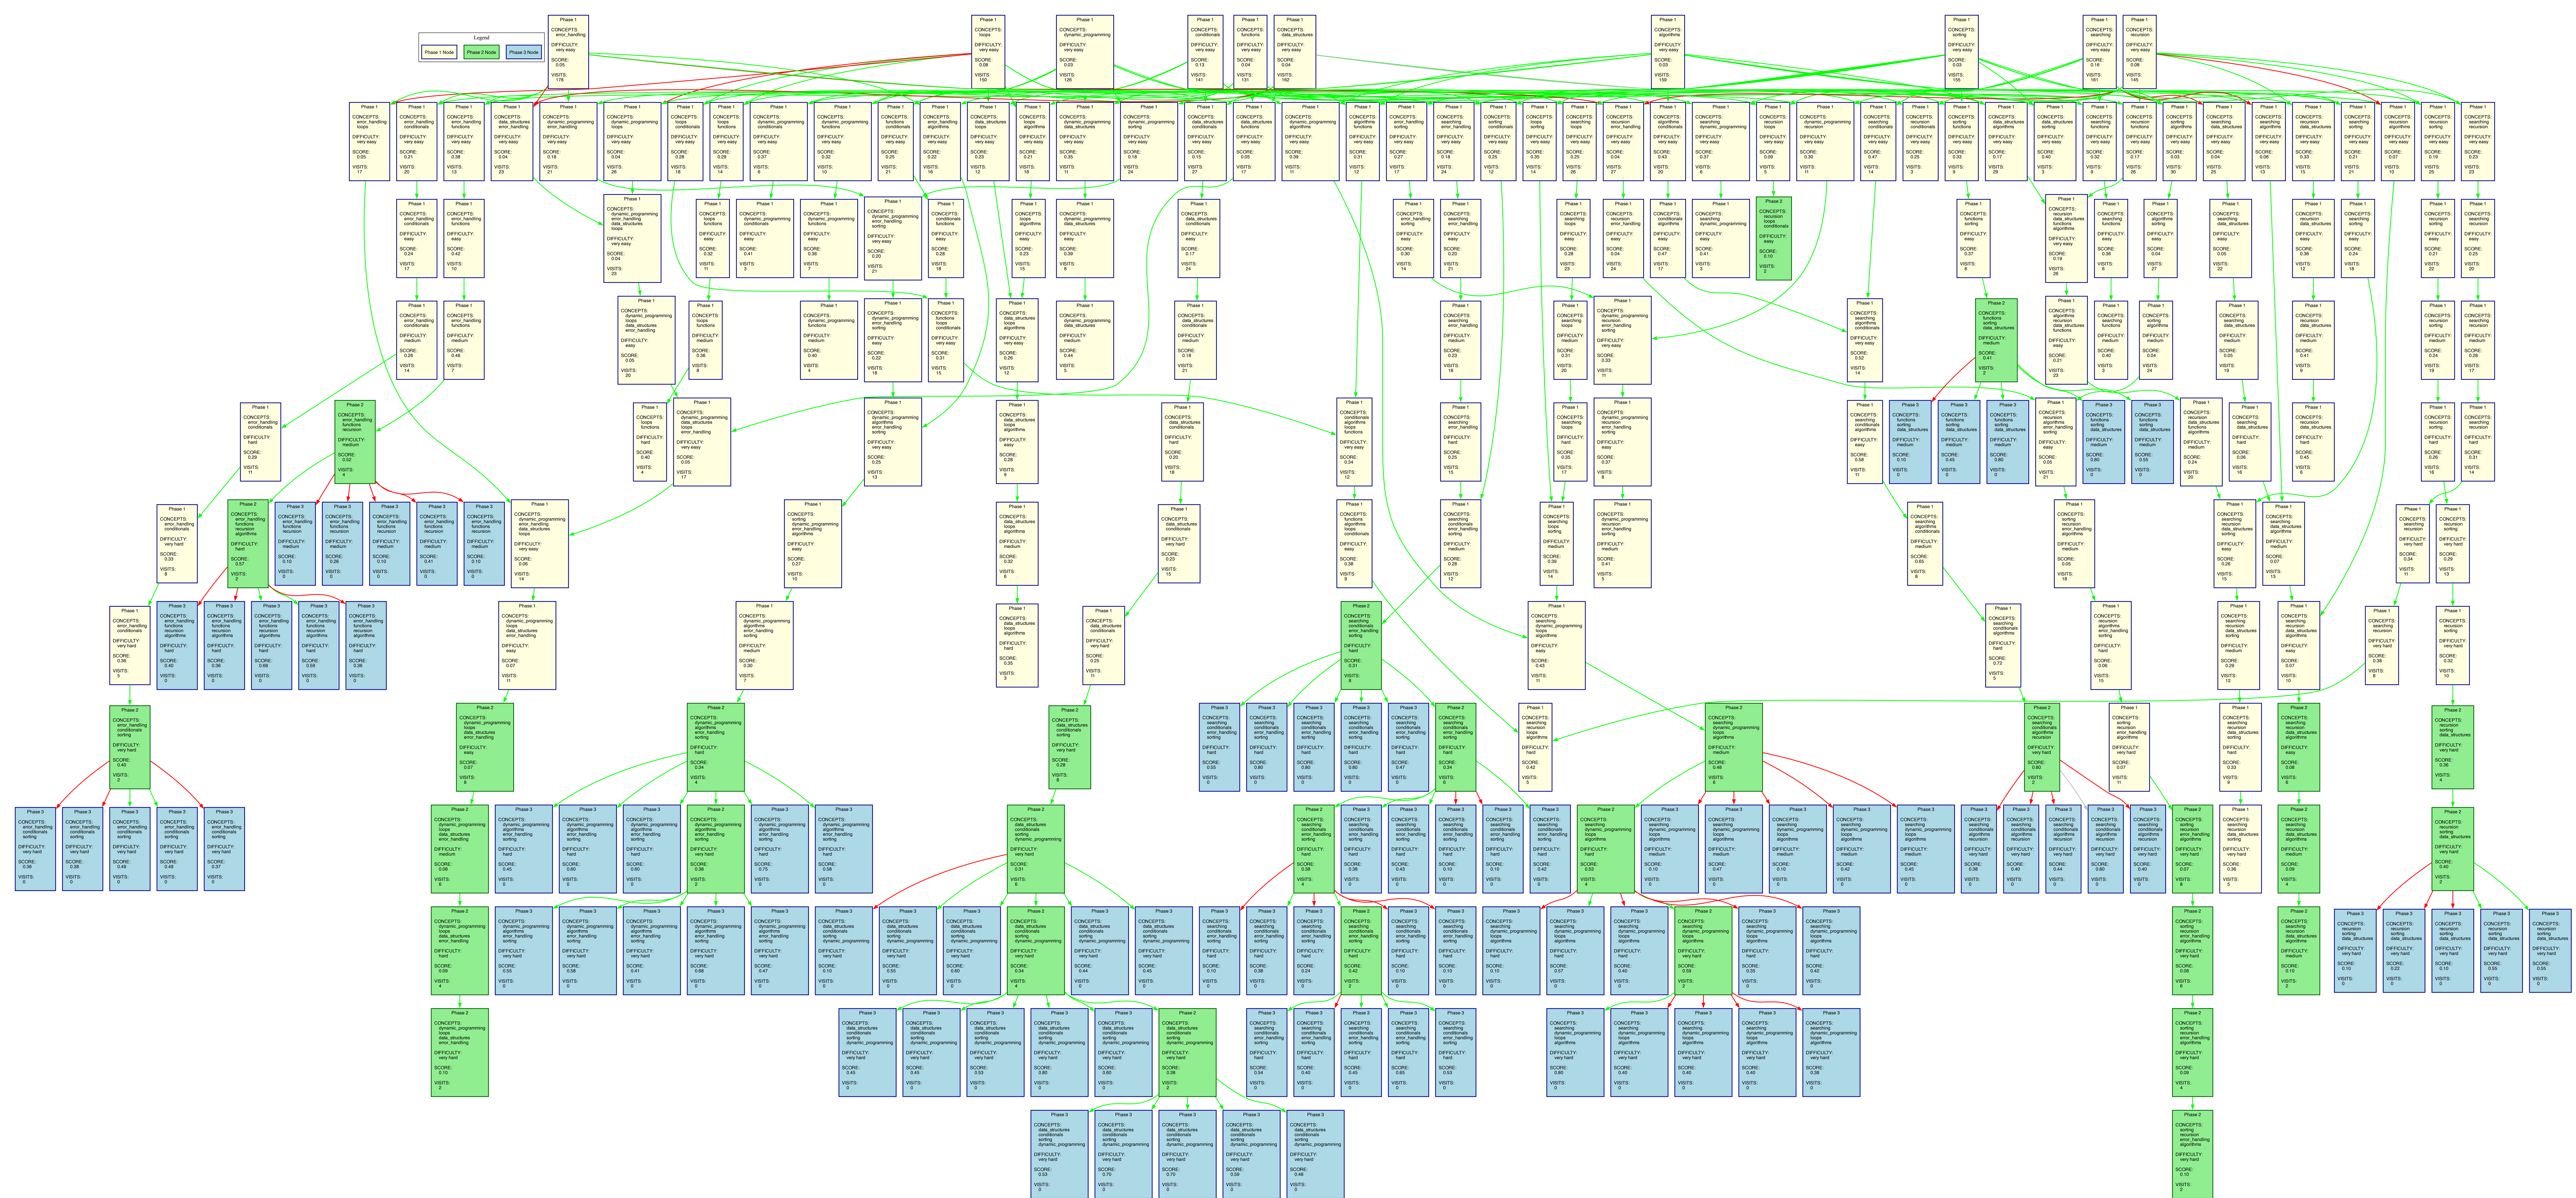

Supplement: supplementary_material [file 4o-mini.pdf › Replication Package/trees/4o-mini.pdf]

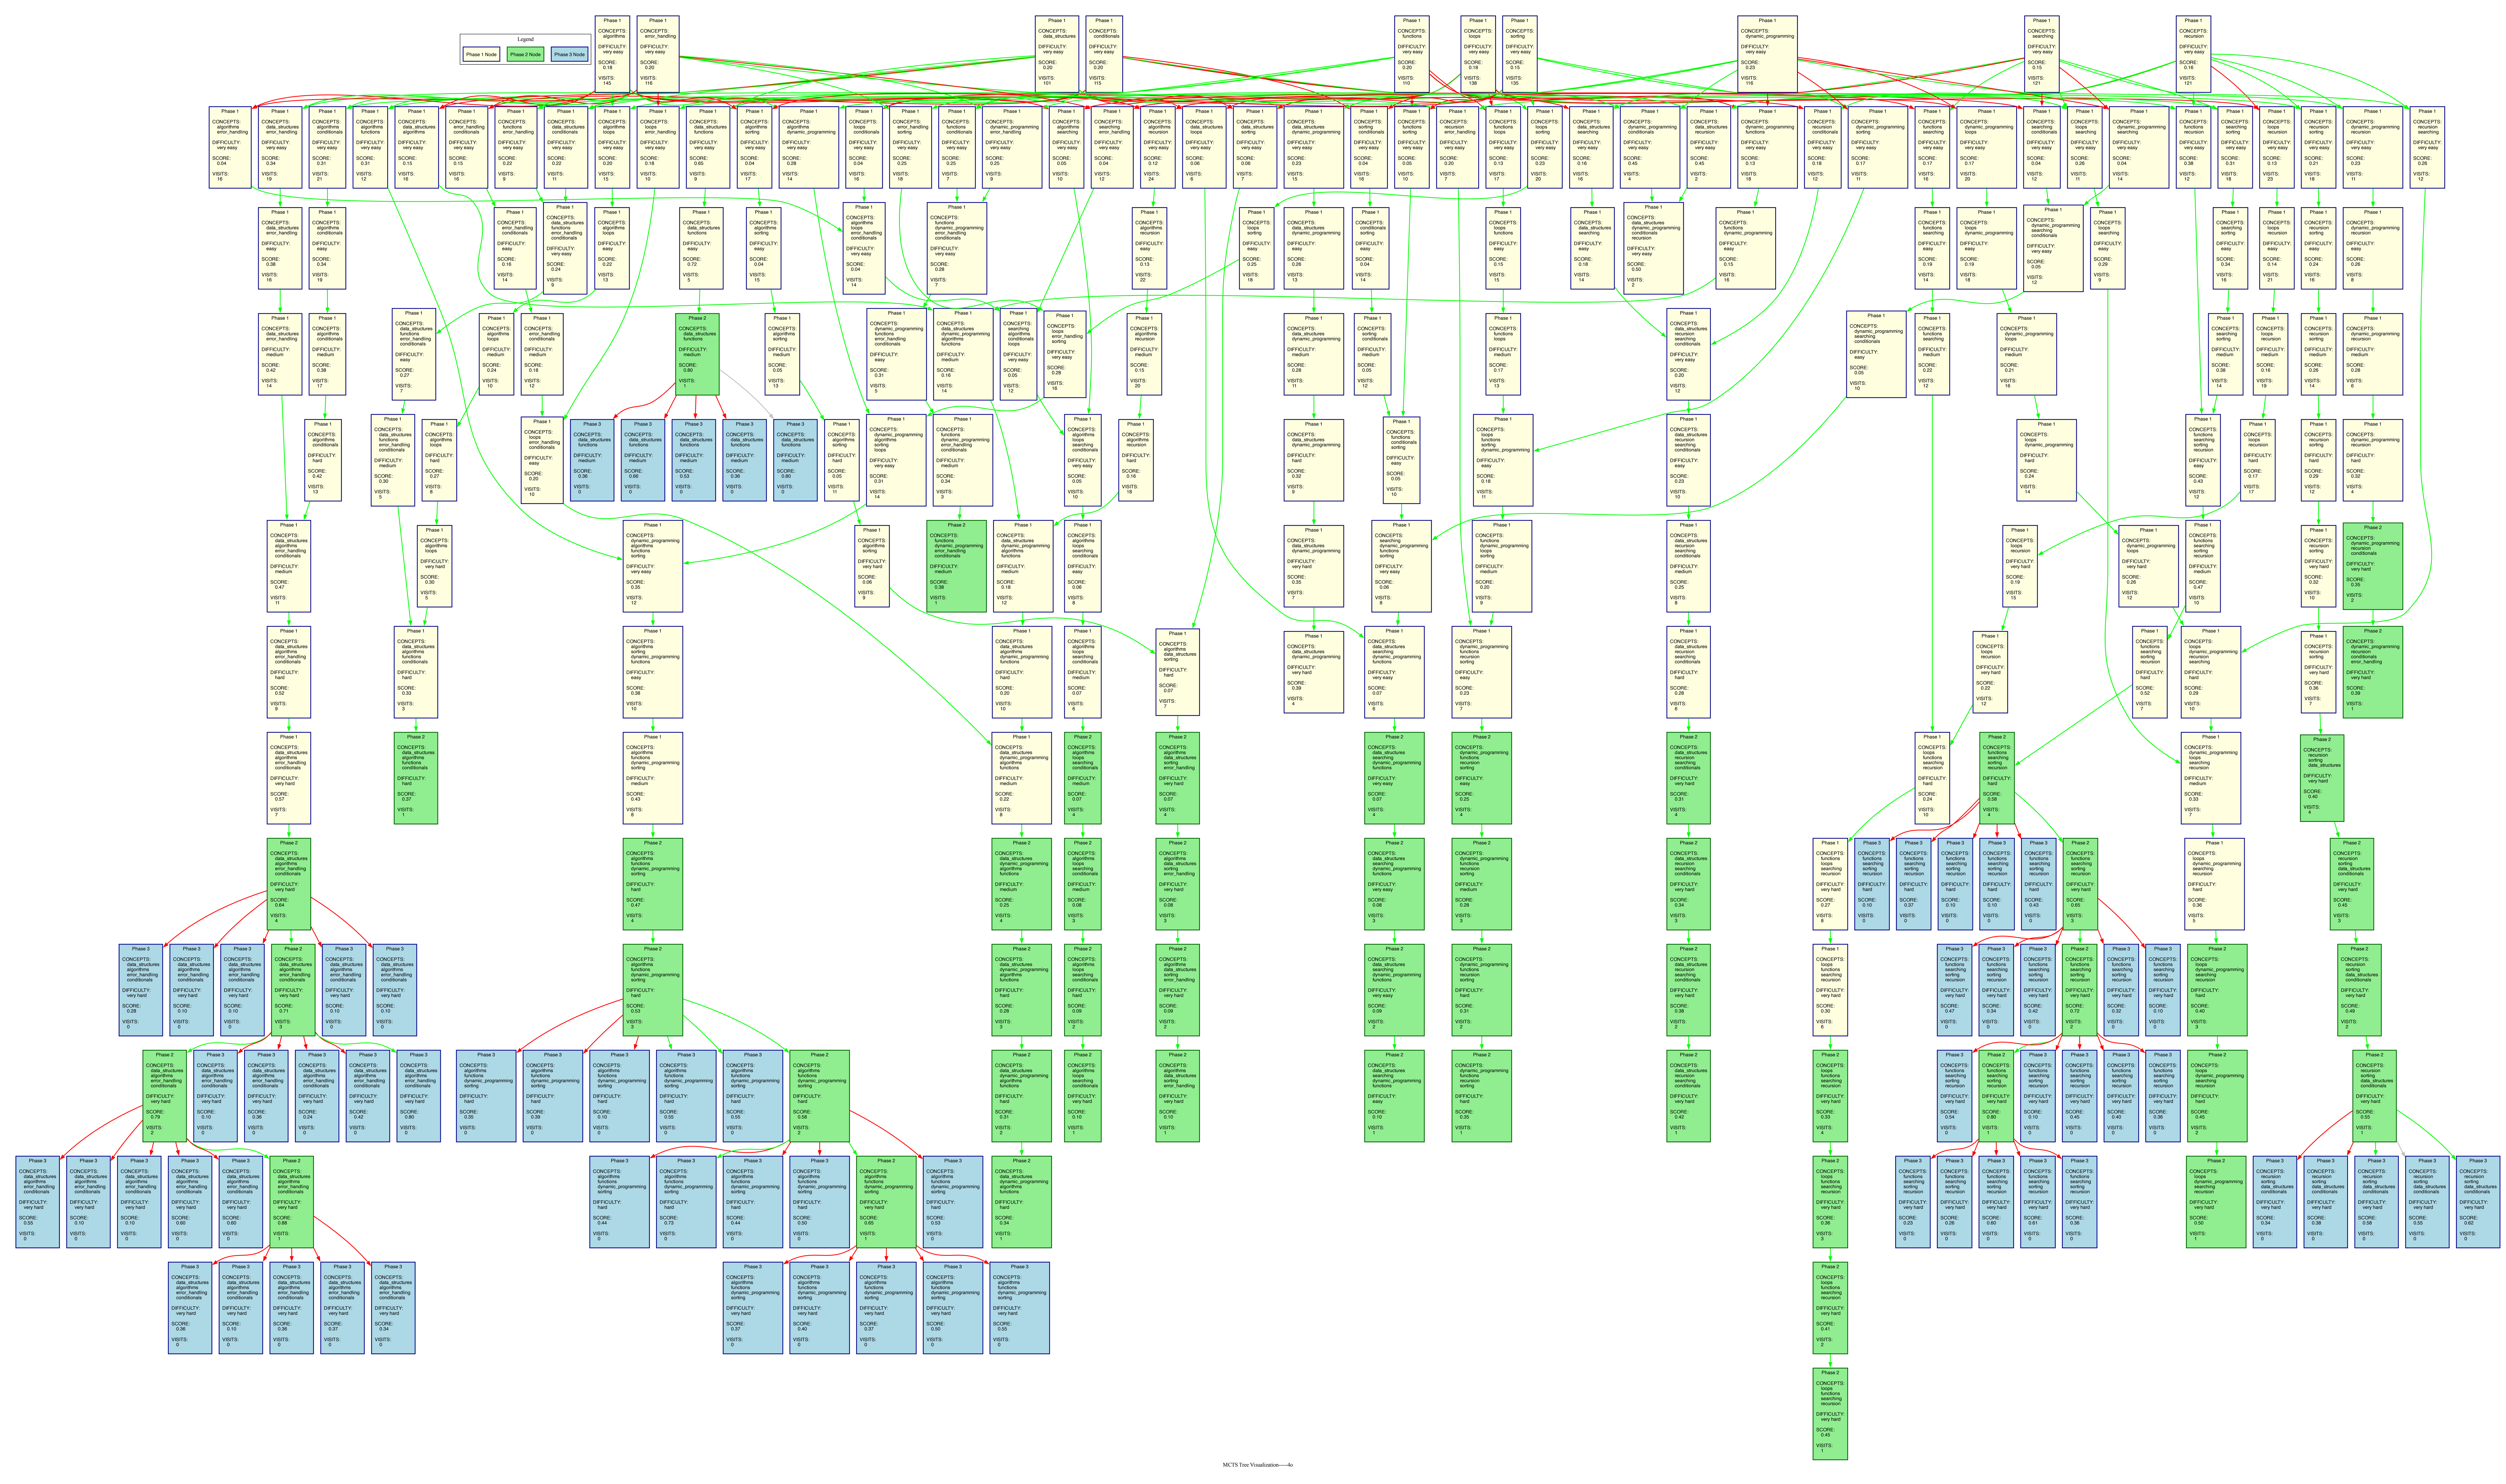

Supplement: supplementary_material [file 4o.pdf › Replication Package/trees/4o.pdf]

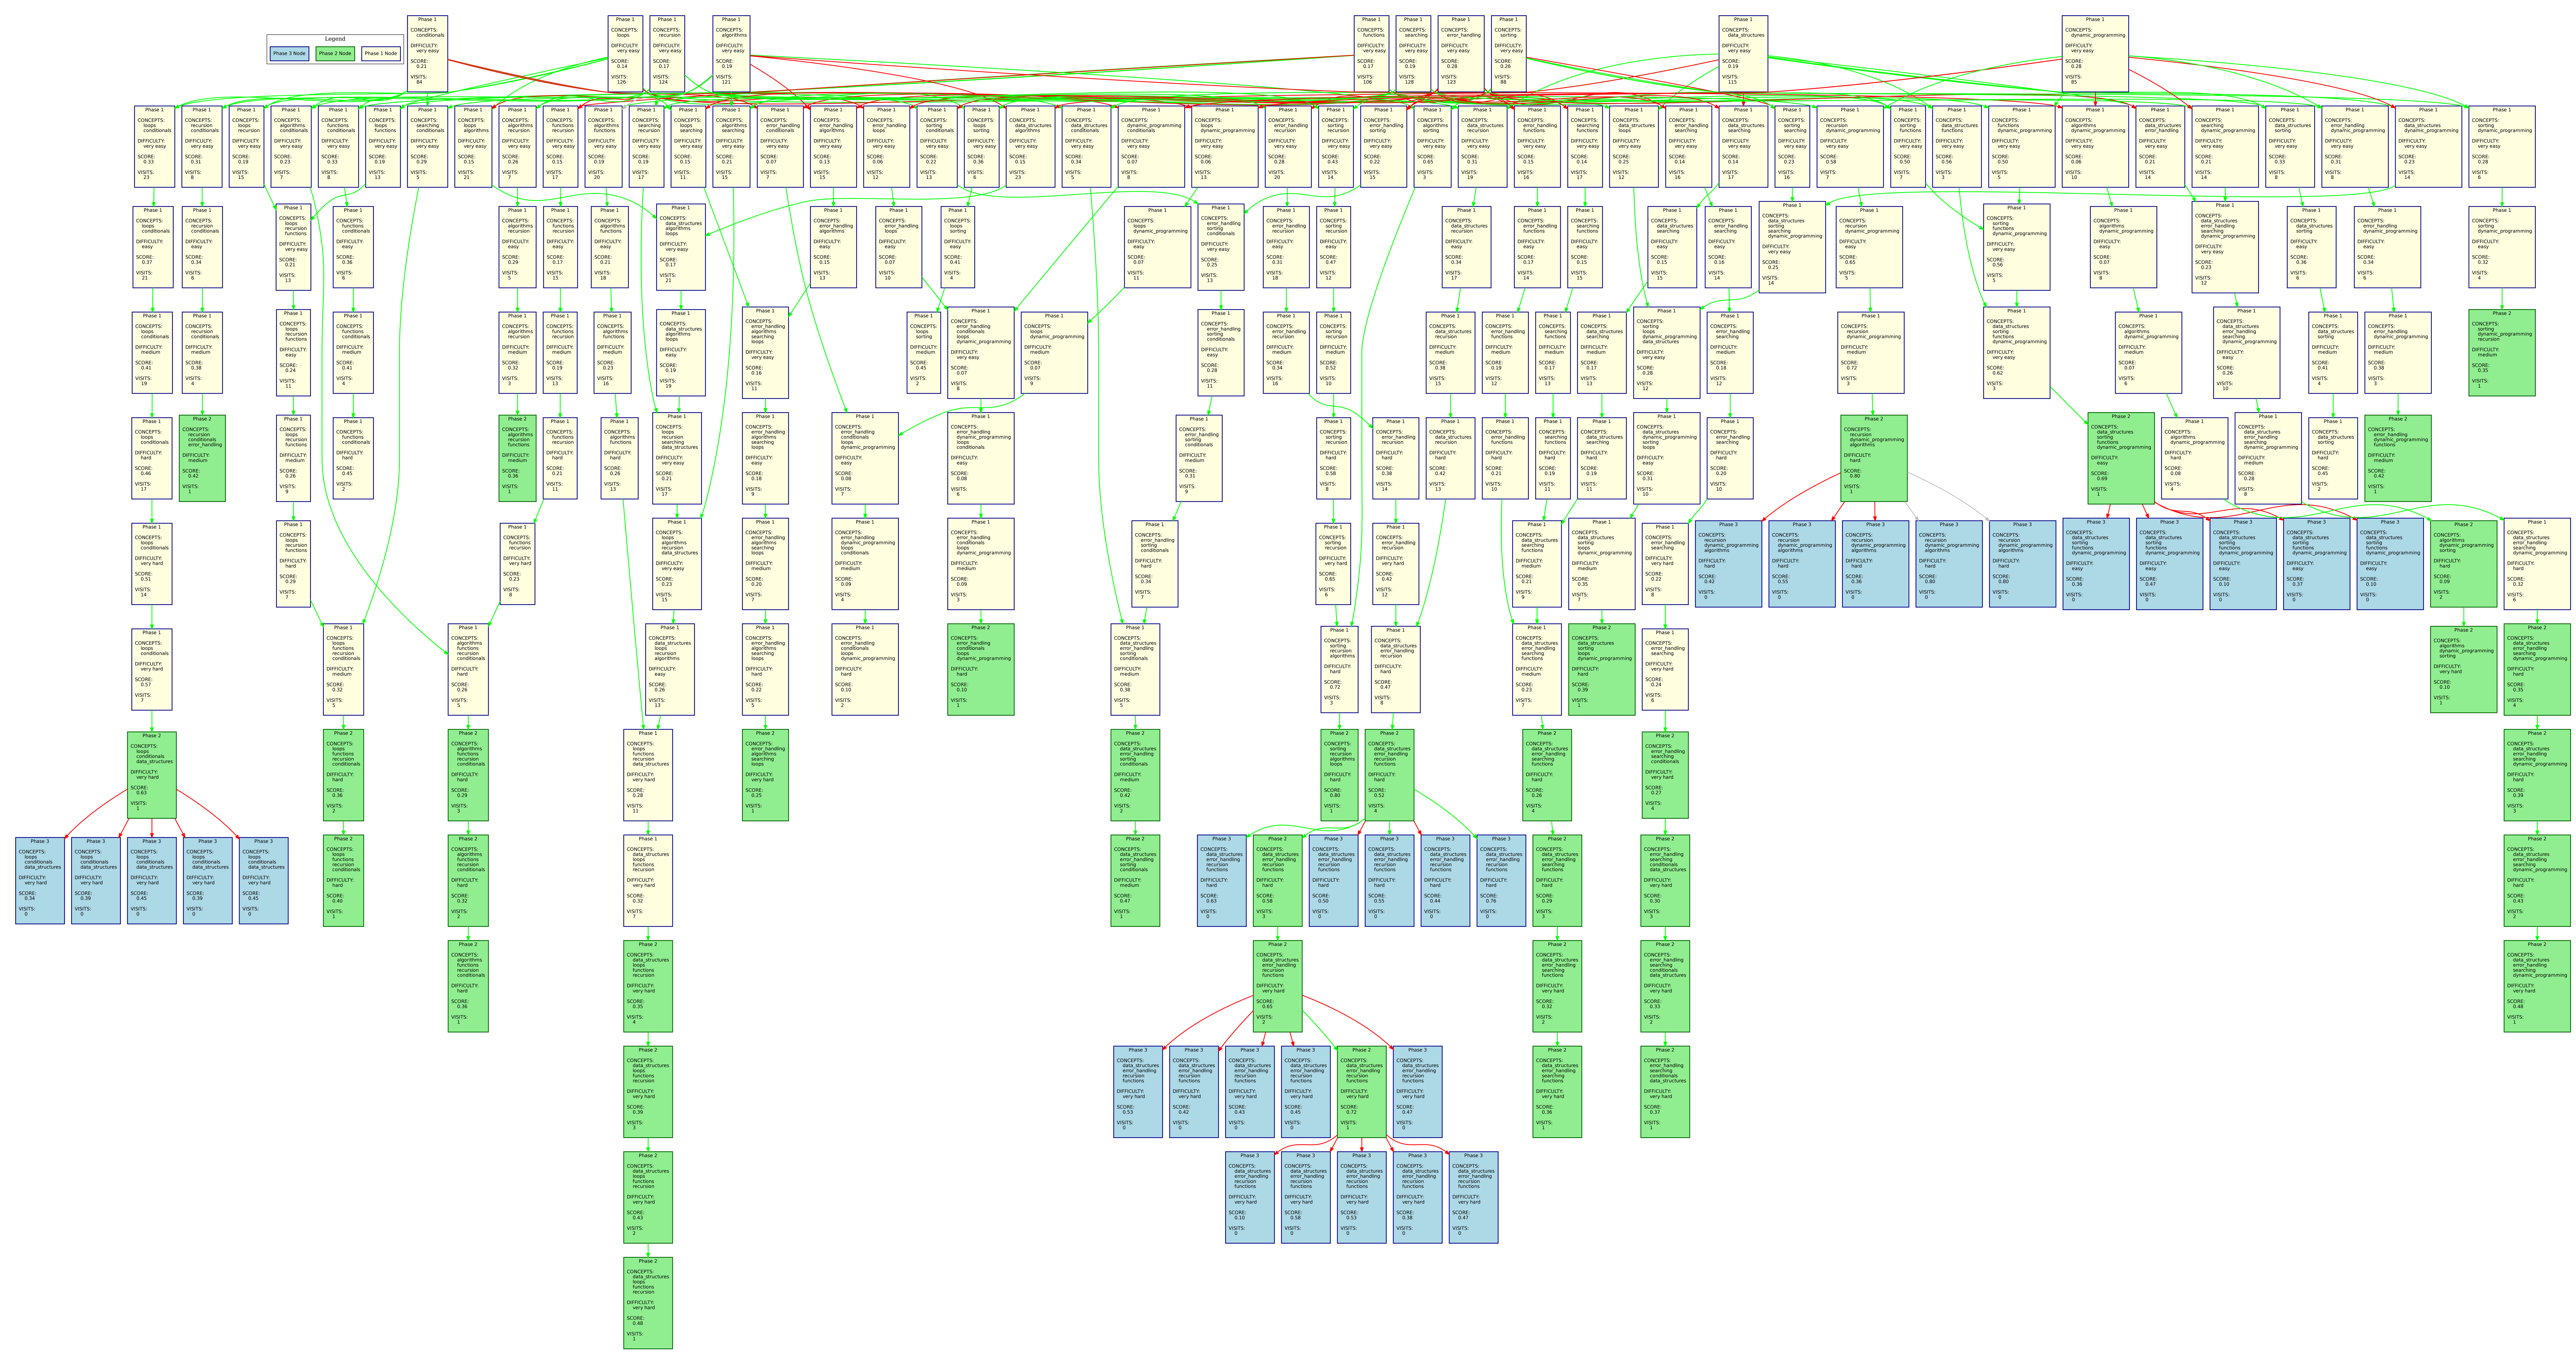

Supplement: supplementary_material [file llama-4.pdf › Replication Package/trees/llama-4.pdf]
